# Supplementary material
Source: PubMed Central journal article supplement (PMC4996932)

## “ Flow Chart of the Methodological Strategy for the Present Study “

Figure S1

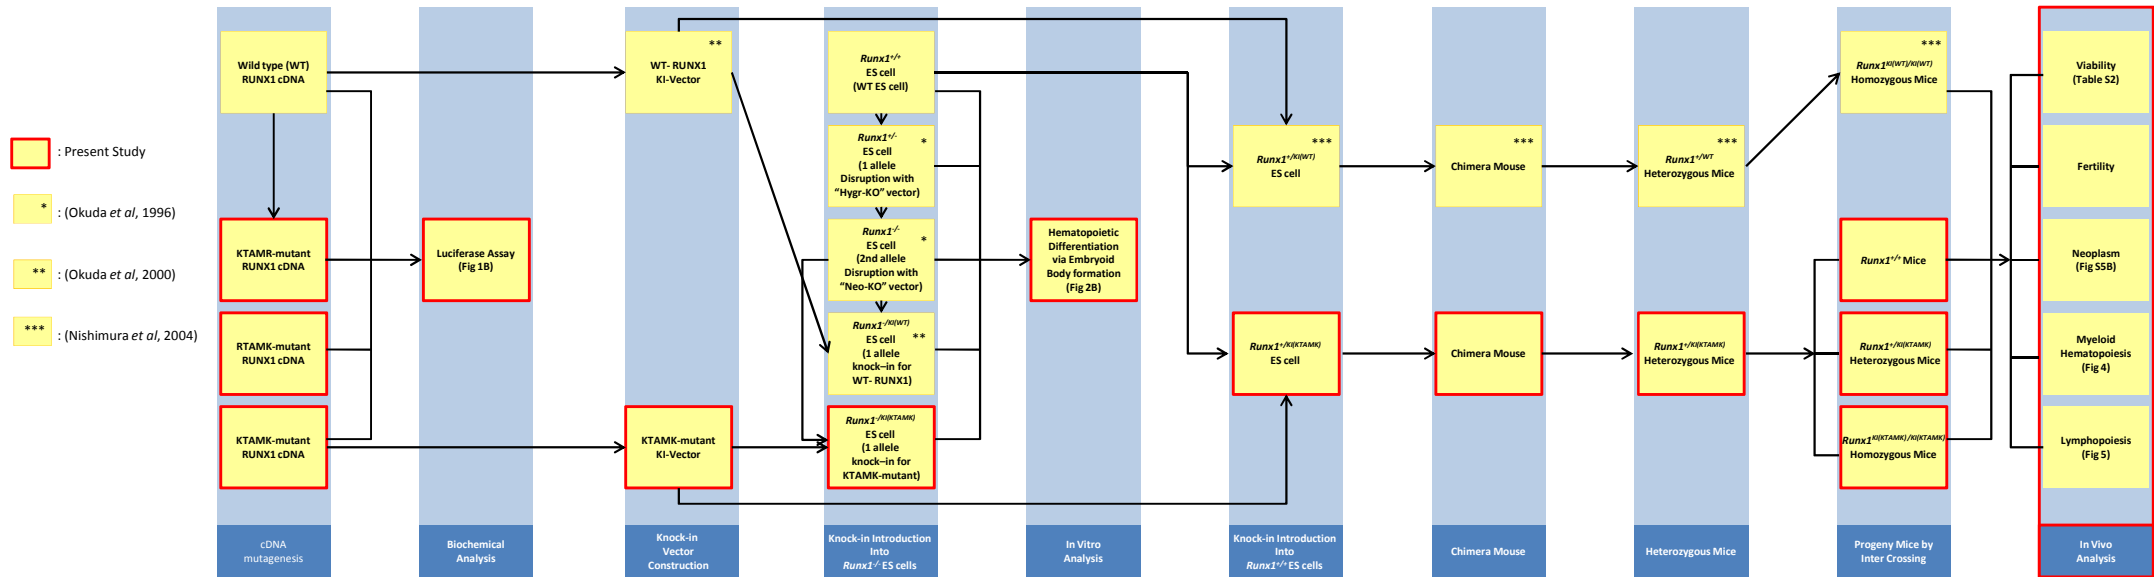

Supplement: NIHMS799938-supplement-Supp_Fig_S1.pdf [file NIHMS799938-supplement-Supp_Fig_S1.pdf]

manuscript number(BJH-2014-02191.R1)

## Figure S2

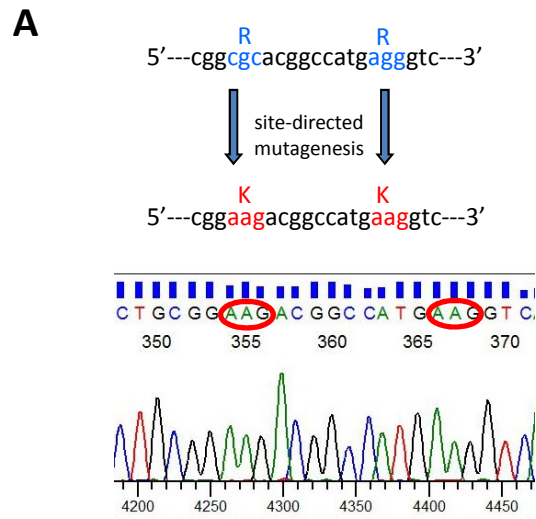

Supplement: NIHMS799938-supplement-Supp_Fig_S2.pdf [file NIHMS799938-supplement-Supp_Fig_S2.pdf]

**Figure S3**

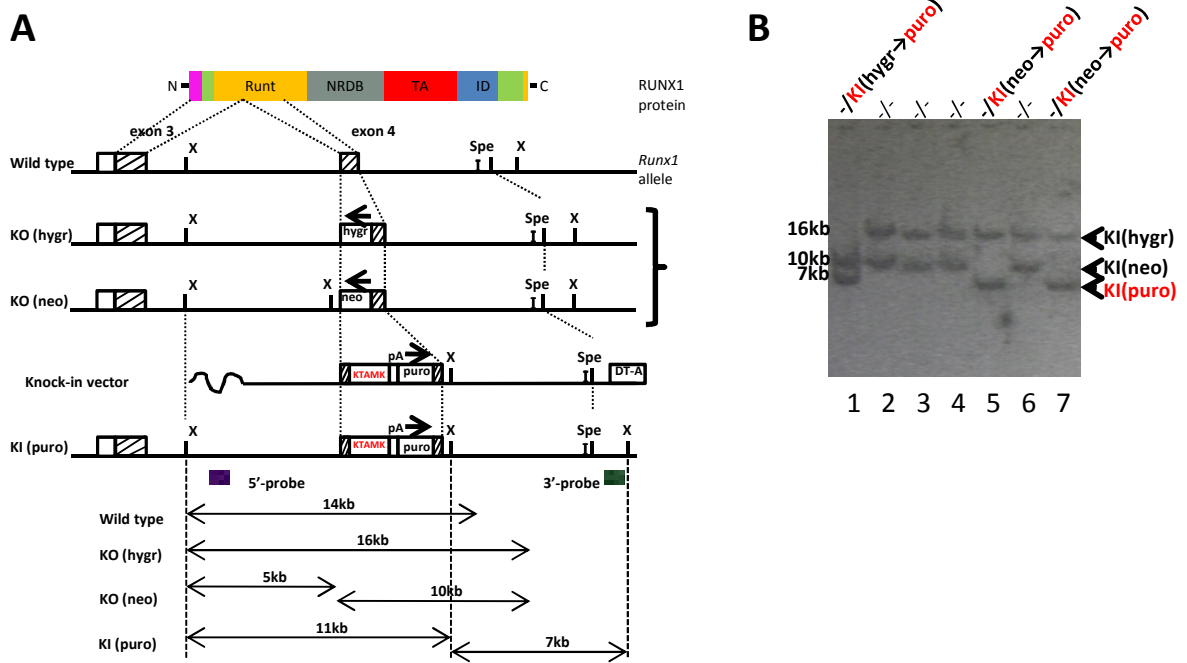

Supplement: NIHMS799938-supplement-Supp_Fig_S3.pdf [file NIHMS799938-supplement-Supp_Fig_S3.pdf]

Figure S4

A

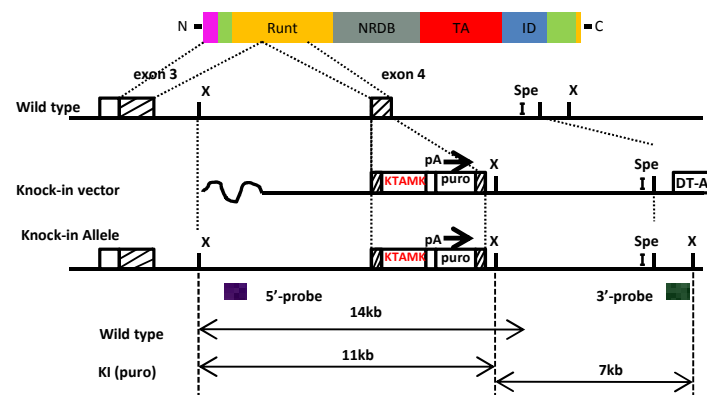

B

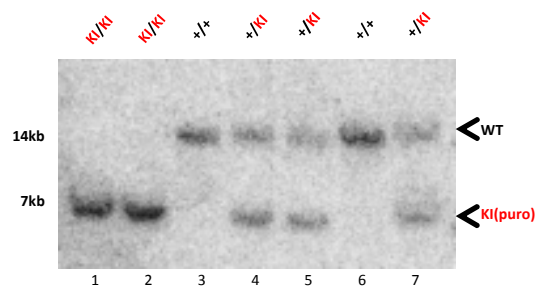

Supplement: NIHMS799938-supplement-Supp_Fig_S4.pdf [file NIHMS799938-supplement-Supp_Fig_S4.pdf]

## Figure S5

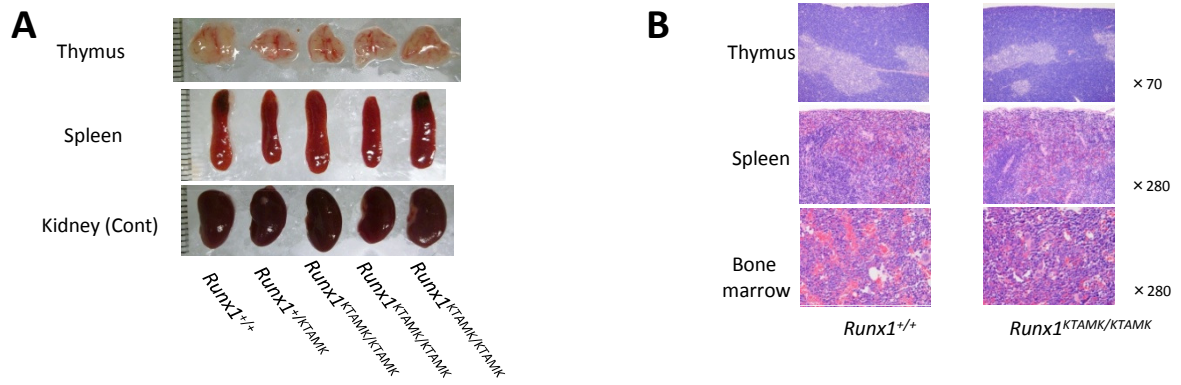

Supplement: NIHMS799938-supplement-Supp_Fig_S5.pdf [file NIHMS799938-supplement-Supp_Fig_S5.pdf]

**Figure S6**

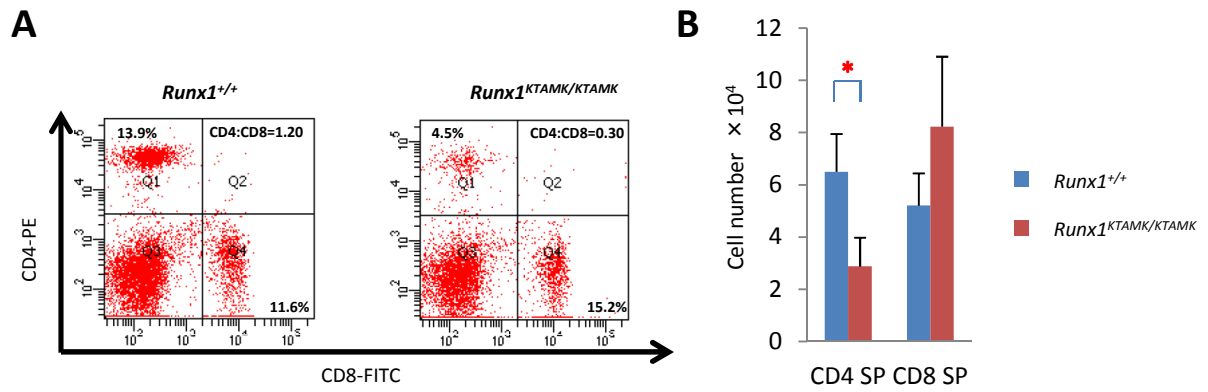

Supplement: NIHMS799938-supplement-Supp_Fig_S6.pdf [file NIHMS799938-supplement-Supp_Fig_S6.pdf]
